# Supplementary material for: The role of hydration in atmospheric salt particle formation
Source: Royal Society of Chemistry journal article supplement (doi:10.1039/d3cp00049d), 2023-01-01
Supplement: d3cp00049d1.pdf [file d3cp00049d1.pdf]

# Supporting information for Role of hydration in atmospheric salt particle formation

Nanna Myllys

## Thermodynamic data

Binding enthalpies and entropies for acid–base clusters are given in Table S1 and for acid–base–water in Table S2.

Table S1: Calculated binding enthalpies ( $\Delta H$  in kcal/mol) and entropies ( $\Delta S$  in cal/(mol·K)) for dry acid–base clusters.

| acid      | SA         |            | MSA        |            | NA         |            |
|-----------|------------|------------|------------|------------|------------|------------|
|           | $\Delta H$ | $\Delta S$ | $\Delta H$ | $\Delta S$ | $\Delta H$ | $\Delta S$ |
| 1acid1GUA | -29.40     | -29.04     | -26.64     | -34.87     | -20.48     | -32.73     |
| 1acid2GUA | -49.52     | -69.39     | -49.75     | -82.27     | -38.81     | -72.63     |
| 1acid3GUA | -71.42     | -110.28    | -69.77     | -115.90    | -59.85     | -112.66    |
| 1acid4GUA | -90.96     | -150.95    | -91.71     | -161.64    | -81.18     | -160.10    |
| 2acid1GUA | -62.19     | -79.74     | -55.46     | -81.60     | -37.35     | -66.67     |
| 2acid2GUA | -100.87    | -109.31    | -99.16     | -119.34    | -77.20     | -114.54    |
| 2acid3GUA | -126.59    | -165.05    | -116.45    | -160.71    | -95.75     | -146.07    |
| 2acid4GUA | -151.05    | -205.20    | -139.55    | -210.30    | -119.21    | -198.56    |
| 3acid1GUA | -86.21     | -116.91    | -81.01     | -126.13    | -51.51     | -94.67     |
| 3acid2GUA | -131.47    | -162.07    | -124.77    | -162.59    | -92.68     | -148.12    |
| 3acid3GUA | -170.35    | -196.83    | -167.69    | -211.77    | -132.75    | -175.01    |
| 3acid4GUA | -203.96    | -236.47    | -190.57    | -253.26    | -157.38    | -238.29    |
| 4acid1GUA | -107.51    | -156.25    | -100.07    | -167.38    | -70.75     | -143.11    |
| 4acid2GUA | -156.94    | -204.28    | -146.43    | -206.54    | -105.82    | -177.28    |
| 4acid3GUA | -202.91    | -242.23    | -196.21    | -261.68    | -145.92    | -206.30    |
| 4acid4GUA | -255.84    | -288.12    | -255.45    | -308.82    | -206.46    | -285.94    |
| 2acid     | -17.77     | -34.17     | -18.88     | -39.70     | -9.40      | -33.34     |
| 3acid     | -36.72     | -76.66     | -35.12     | -80.41     | -14.15     | -63.96     |
| 4acid     | -52.64     | -102.62    | -54.73     | -128.53    | -24.87     | -101.67    |
| 2GUA      |            |            |            |            | -12.42     | -34.16     |
| 3GUA      |            |            |            |            | -24.89     | -73.20     |
| 4GUA      |            |            |            |            | -44.93     | -115.52    |

Table S2: Calculated binding enthalpies ( $\Delta H$  in kcal/mol) and entropies ( $\Delta S$  in cal/(mol·K)) for acid–base–water clusters.

| acid        | SA         |            | MSA        |            | NA         |            |
|-------------|------------|------------|------------|------------|------------|------------|
|             | $\Delta H$ | $\Delta S$ | $\Delta H$ | $\Delta S$ | $\Delta H$ | $\Delta S$ |
| 1acid1GUA1W | -41.17     | -67.23     | -39.75     | -73.68     | -28.46     | -60.82     |
| 1acid1GUA2W | -57.13     | -100.96    | -55.49     | -107.62    | -43.85     | -102.09    |
| 1acid1GUA3W | -70.81     | -135.78    | -69.09     | -140.22    | -59.51     | -138.64    |
| 1acid1GUA4W | -80.10     | -165.32    | -80.12     | -176.64    | -69.79     | -167.55    |
| 1acid2GUA1W | -65.14     | -108.17    | -63.76     | -111.86    | -54.03     | -109.56    |
| 1acid2GUA2W | -76.70     | -137.43    | -73.77     | -143.04    | -64.85     | -139.48    |
| 1acid2GUA3W | -88.72     | -173.22    | -85.70     | -178.02    | -76.51     | -174.13    |
| 1acid2GUA4W | -104.35    | -221.79    | -95.87     | -210.84    | -88.46     | -211.69    |
| 2acid1GUA1W | -73.59     | -108.58    | -68.43     | -113.90    | -49.43     | -102.57    |
| 2acid1GUA2W | -87.18     | -144.17    | -82.98     | -151.62    | -64.68     | -141.75    |
| 2acid1GUA3W | -98.36     | -179.52    | -94.56     | -186.78    | -75.80     | -174.90    |
| 2acid1GUA4W | -107.91    | -204.46    | -105.26    | -221.76    | -85.92     | -203.64    |
| 2acid2GUA1W | -113.27    | -152.33    | -109.62    | -156.87    | -87.99     | -142.22    |
| 2acid2GUA2W | -127.19    | -188.67    | -120.31    | -186.75    | -97.97     | -164.88    |
| 2acid2GUA3W | -138.87    | -223.02    | -132.96    | -226.69    | -111.22    | -211.81    |
| 2acid2GUA4W | -147.64    | -244.43    | -144.07    | -252.43    | -122.57    | -248.71    |
| 1acid1W     | -11.13     | -29.45     | -10.97     | -31.74     | -8.71      | -28.94     |
| 1acid2W     | -21.70     | -61.35     | -21.03     | -64.71     | -16.89     | -57.68     |
| 1acid3W     | -32.44     | -97.39     | -32.05     | -98.71     | -25.22     | -89.91     |
| 1acid4W     | -43.40     | -125.52    | -42.22     | -135.37    | -32.92     | -121.95    |
| 2acid1W     | -26.40     | -69.46     | -28.25     | -70.61     | -17.35     | -62.67     |
| 2acid2W     | -37.95     | -99.82     | -41.27     | -112.93    | -27.34     | -93.65     |
| 2acid3W     | -49.48     | -137.31    | -52.95     | -147.38    | -36.73     | -127.58    |
| 2acid4W     | -60.80     | -177.98    | -68.50     | -187.48    | -43.80     | -161.82    |
| 2GUA1W      |            |            |            |            | -20.73     | -65.79     |
| 2GUA2W      |            |            |            |            | -33.52     | -99.10     |
| 2GUA3W      |            |            |            |            | -41.65     | -135.31    |
| 2GUA4W      |            |            |            |            | -48.54     | -162.99    |

## Hydration of 2acid2guanidine clusters

Molecular structures of hydrated 2acid2guanidine clusters are shown in Figure S1.

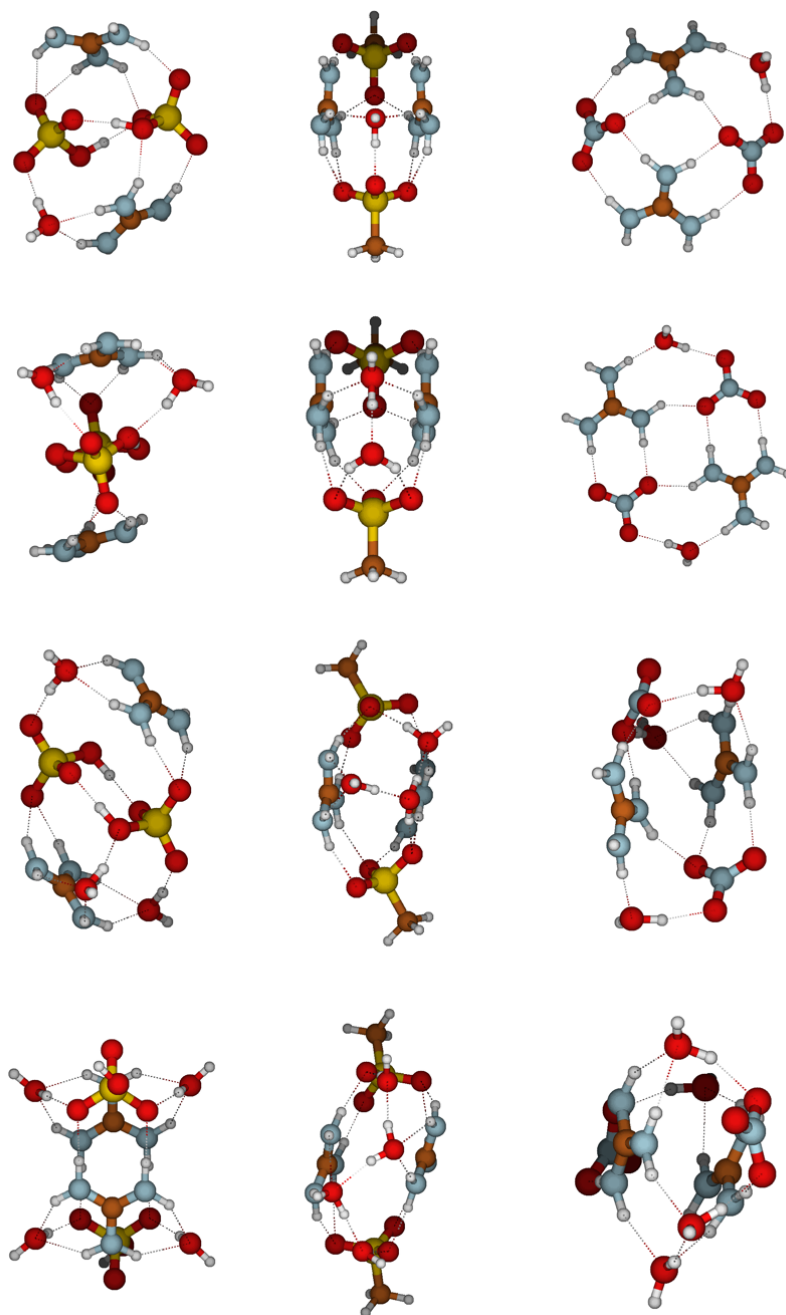

Figure S1: Molecular structures of 2SA2GUA (left), 2MSA2GUA (middle), and 2NA2GUA clusters with one to four water molecules.

## Cluster Population Dynamics Simulations

The time evolution and behavior of a population of clusters of different sizes and compositions is obtained by integrating the time derivatives of the cluster concentrations using the Atmospheric Cluster Dynamics Code.<sup>1,2</sup> These birth–death equations include all possible processes where the clusters can be formed or destroyed. For cluster  $i$  of a given composition, the time derivative is

$$\begin{aligned} \frac{dC_i}{dt} = & \frac{1}{2} \sum_{j < i} \beta_{j,(i-j)} C_j C_{(i-j)} + \sum_j \gamma_{(i+j) \rightarrow i,j} C_{(i+j)} - \sum_j \beta_{i,j} C_i C_j - \\ & \frac{1}{2} \sum_{j < i} \gamma_{i \rightarrow j,i-j} C_i + S_i - L_i C_i, \end{aligned} \quad (1)$$

where  $C_i$  is the concentration of cluster  $i$ ,  $\beta_{i,j}$  is the collision rate coefficient between  $i$  and  $j$ ,  $\gamma_{(i+j) \rightarrow i,j}$  is the evaporation rate coefficient of cluster  $(i+j)$ ,  $S_i$  is an external source term, and  $L_i$  is an external loss term corresponding to coagulation onto pre-existing surfaces. The loss rate  $L_i$  was assumed to depend on cluster size according to the parametrization by Lehtinen *et al.*<sup>3</sup> The reference loss rate, corresponding to a sulfuric acid molecule, was set to  $10^{-3} \text{ s}^{-1}$ , and the scavenging coefficient  $m$  to  $-1.6$  corresponding to typical atmospheric conditions.

The evaporation rates of the clusters are obtained from the Gibbs free binding energies  $\Delta G$  of the evaporating cluster and its products as

$$\gamma_{(i+j) \rightarrow i,j} = \beta_{i,j} \frac{p_{\text{ref}}}{k_{\text{B}}T} \exp\left(\frac{\Delta G_{i+j} - \Delta G_i - \Delta G_j}{k_{\text{B}}T}\right). \quad (2)$$

The collision coefficients are computed from kinetic gas theory as

$$\beta_{i,j} = \left(\frac{3}{4\pi}\right)^{1/6} \left[6k_{\text{B}}T \left(\frac{1}{m_i} + \frac{1}{m_j}\right)\right]^{1/2} \left(V_i^{1/3} + V_j^{1/3}\right)^2, \quad (3)$$

where  $m_i$  and  $V_i$  are the mass and volume of cluster  $i$ , respectively. The volumes are calculated using bulk liquid densities (1830, 1480, 1510, and  $1300 \frac{\text{kg}}{\text{m}^3}$  for sulfuric acid, methanesulfonic acid, nitric acid and guanidine, respectively) assuming spherical clusters and ideal mixing.

### Boundary conditions in particle formation simulations

In ACDC simulations, clusters are allowed to grow out of the 2acid2base simulation system as “stable” particles. In these simulations, clusters containing at least three acid and two base molecules were selected as outgrowing particles. It should be noted that to obtain accurate absolute NPF rates, larger simulation size is needed (at least four acid and four base). Therefore, the formed particle outside of a simulation box might not truly be stable (especially in the case of nitric acid clusters), which leads artificially too high NPF rates. Thus, reader should be careful with absolute  $J$  values and focus on computed humidity factors.

## References

- [1] M. J. McGrath, T. Olenius, I. K. Ortega, V. Loukonen, P. Paasonen, T. Kurtén, M. Kulmala and H. Vehkamäki, Atmospheric Cluster Dynamics Code: a Flexible Method for Solution of the Birth–Death Equations, *Atmos. Chem. Phys.*, 2012, **12**, 2345–2355.
- [2] T. Olenius, O. Kupiainen-Määttä, I. K. Ortega, T. Kurtén and H. Vehkamäki, Free Energy Barrier in the Growth of Sulfuric Acid–Ammonia and Sulfuric Acid–Dimethylamine Clusters, *J. Chem. Phys.*, 2013, **139**, 084312.
- [3] K. E. Lehtinen, M. D. Maso, M. Kulmala and V.-M. Kerminen, Estimating Nucleation Rates from Apparent Particle Formation Rates and vice versa: Revised Formulation of the Kerminen–Kulmala Equation, *J. Aerosol Sci.*, 2007, **38**, 988–994.
